# Supplementary material for: Spectroscopic evidence of n → π* interactions involving carbonyl groups
Source: Royal Society of Chemistry journal article supplement (doi:10.1039/d0cp03557b), 2020-01-01
Supplement: d0cp03557b1.xlsx [file d0cp03557b1.xlsx]

## Sheet: Phenyl formate
Interactions	Donor orbital	Acceptor orbital	cis	trans	(cis-trans)
			E2	E2	E2(cis-trans)
			kcal/mol	kcal/mol	kcal/mol
among the carbon atoms	BD ( 1) C 1 - C 2	RY*( 1) C 3	1.29	1.42	-0.13
within the phenyl ring	BD ( 1) C 1 - C 2	RY*( 1) C 6	1.11	1.26	-0.15
	BD ( 1) C 1 - C 2	RY*( 2) C 6	1.07	1.02	0.05
	BD ( 1) C 1 - C 2	BD*( 1) C 1 - C 3	4.49	4.52	-0.03
	BD ( 1) C 1 - C 2	BD*( 1) C 2 - C 6	2.77	2.9	-0.13
	BD ( 2) C 1 - C 2	RY*( 3) C 3	0	2.01	-2.01
	BD ( 2) C 1 - C 2	RY*( 3) C 6	0	1.47	-1.47
	BD ( 2) C 1 - C 2	BD*( 2) C 3 - C 7	0	26.95	-26.95
	BD ( 2) C 1 - C 2	BD*( 2) C 6 - C 10	0	29.28	-29.28
	BD ( 1) C 1 - C 3	RY*( 1) C 2	1.28	1.15	0.13
	BD ( 1) C 1 - C 3	RY*( 1) C 7	1.13	1.07	0.06
	BD ( 1) C 1 - C 3	RY*( 2) C 7	1.07	1.12	-0.05
	BD ( 1) C 1 - C 3	BD*( 1) C 1 - C 2	4.49	4.47	0.02
	BD ( 1) C 1 - C 3	BD*( 1) C 3 - C 7	2.84	2.75	0.09
	BD ( 1) C 1 - C 3	RY*( 3) C 2	0.97	0	0.97
	BD ( 1) C 1 - C 3	RY*( 4) C 2	1.04	0	1.04
	BD ( 1) C 1 - C 3	RY*( 3) C 7	0.96	0	0.96
	BD ( 1) C 1 - C 3	RY*( 5) C 7	0.51	0	0.51
	BD ( 1) C 1 - C 3	BD*( 2) C 2 - C 6	28.45	0	28.45
	BD ( 1) C 1 - C 3	BD*( 2) C 7 - C 10	29.33	0	29.33
	BD ( 1) C 2 - C 6	RY*( 1) C 1	0.64	0	0.64
	BD ( 1) C 2 - C 6	RY*( 2) C 1	0.61	2.2	-1.59
	BD ( 1) C 2 - C 6	RY*( 3) C 1	1.82	0	1.82
	BD ( 1) C 2 - C 6	RY*( 1) C 10	0.79	0.76	0.03
	BD ( 1) C 2 - C 6	RY*( 2) C 10	1.22	1.23	-0.01
	BD ( 1) C 2 - C 6	BD*( 1) C 1 - C 2	3.05	3.22	-0.17
	BD ( 1) C 2 - C 6	BD*( 1) C 6 - C 10	2.64	2.73	-0.09
	BD ( 1) C 2 - C 6	RY*( 7) C 1	0.65	0	0.65
	BD ( 1) C 2 - C 6	RY*( 3) C 10	1.35	0	1.35
	BD ( 1) C 2 - C 6	BD*( 2) C 1 - C 3	32.38	0	32.38
	BD ( 1) C 2 - C 6	BD*( 2) C 7 - C 10	28.27	0	28.27
	BD ( 1) C 3 - C 7	RY*( 1) C 1	0.84	2.2	-1.36
	BD ( 1) C 3 - C 7	RY*( 3) C 1	2.12	0	2.12
	BD ( 1) C 3 - C 7	RY*( 1) C 10	0.78	0.79	-0.01
	BD ( 1) C 3 - C 7	RY*( 2) C 10	1.24	1.22	0.02
	BD ( 1) C 3 - C 7	BD*( 1) C 1 - C 3	3.12	2.98	0.14
	BD ( 1) C 3 - C 7	BD*( 1) C 7 - C 10	2.69	2.66	0.03
	BD ( 2) C 3 - C 7	RY*( 3) C 10	0	1.38	-1.38
	BD ( 2) C 3 - C 7	BD*( 2) C 1 - C 2	0	32.72	-32.72
	BD ( 2) C 3 - C 7	BD*( 2) C 6 - C 10	0	27.67	-27.67
	BD ( 1) C 6 - C 10	RY*( 2) C 2	1.75	1.63	0.12
	BD ( 1) C 6 - C 10	RY*( 1) C 7	0.58	0.65	-0.07
	BD ( 1) C 6 - C 10	RY*( 2) C 7	1.44	1.37	0.07
	BD ( 1) C 6 - C 10	BD*( 1) C 2 - C 6	2.66	2.74	-0.08
	BD ( 1) C 6 - C 10	BD*( 1) C 7 - C 10	2.71	2.68	0.03
	BD ( 2) C 6 - C 10	RY*( 3) C 2	0	1.43	-1.43
	BD ( 2) C 6 - C 10	RY*( 3) C 7	0	1.67	-1.67
	BD ( 2) C 6 - C 10	BD*( 2) C 1 - C 2	0	28.42	-28.42
	BD ( 2) C 6 - C 10	BD*( 2) C 3 - C 7	0	31.02	-31.02
	BD ( 1) C 7 - C 10	RY*( 2) C 3	1.72	1.97	-0.25
	BD ( 1) C 7 - C 10	RY*( 1) C 6	0.58	0.51	0.07
	BD ( 1) C 7 - C 10	RY*( 2) C 6	1.43	1.5	-0.07
	BD ( 1) C 7 - C 10	BD*( 1) C 3 - C 7	2.71	2.67	0.04
	BD ( 1) C 7 - C 10	BD*( 1) C 6 - C 10	2.7	2.71	-0.01
	BD ( 1) C 7 - C 10	RY*( 3) C 3	0.74	0	0.74
	BD ( 1) C 7 - C 10	RY*( 3) C 6	1.29	0	1.29
	BD ( 1) C 7 - C 10	BD*( 2) C 1 - C 3	28.9	0	28.9
	BD ( 1) C 7 - C 10	BD*( 2) C 2 - C 6	30.85	0	30.85
	CR ( 1) C 1	RY*( 2) C 2	1.98	1.83	0.15
	CR ( 1) C 1	RY*( 2) C 3	2	1.98	0.02
	CR ( 1) C 1	BD*( 1) C 1 - C 2	0.88	0.85	0.03
	CR ( 1) C 1	BD*( 1) C 1 - C 3	0.9	0.9	0
	CR ( 1) C 1	BD*( 1) C 2 - C 6	0.56	0.56	0
	CR ( 1) C 1	BD*( 1) C 3 - C 7	0.57	0.57	0
	CR ( 1) C 2	RY*( 1) C 1	0	2.07	-2.07
	CR ( 1) C 2	RY*( 3) C 1	2.45	0	2.45
	CR ( 1) C 2	RY*( 2) C 1	0	0.66	-0.66
	CR ( 1) C 2	RY*( 2) C 6	1.97	2.12	-0.15
	CR ( 1) C 2	BD*( 1) C 1 - C 3	0.99	0.93	0.06
	CR ( 1) C 2	BD*( 1) C 6 - C 10	0.68	0.69	-0.01
	CR ( 1) C 3	RY*( 2) C 1	0.83	2.36	-1.53
	CR ( 1) C 3	RY*( 3) C 1	1.85	0	1.85
	CR ( 1) C 3	RY*( 2) C 7	1.99	1.92	0.07
	CR ( 1) C 3	BD*( 1) C 1 - C 2	0.99	1.05	-0.06
	CR ( 1) C 6	RY*( 1) C 2	0.67	0.64	0.03
	CR ( 1) C 6	RY*( 2) C 2	1.07	1.11	-0.04
	CR ( 1) C 6	RY*( 2) C 10	1.79	1.74	0.05
	CR ( 1) C 6	BD*( 1) C 1 - C 2	0.62	0.65	-0.03
	CR ( 1) C 6	BD*( 1) C 7 - C 10	0.68	0.67	0.01
	CR ( 1) C 7	RY*( 1) C 3	0.64	0.89	-0.25
	CR ( 1) C 7	RY*( 2) C 3	1.03	1.03	0
	CR ( 1) C 7	RY*( 2) C 10	1.8	1.85	-0.05
	CR ( 1) C 7	BD*( 1) C 1 - C 3	0.63	0.62	0.01
	CR ( 1) C 7	BD*( 1) C 6 - C 10	0.68	0.67	0.01
	CR ( 1) C 10	RY*( 2) C 6	1.54	0.56	0.98
	CR ( 1) C 10	RY*( 2) C 6	0	1.42	-1.42
	CR ( 1) C 10	RY*( 2) C 7	1.55	1.64	-0.09
	CR ( 1) C 10	BD*( 1) C 2 - C 6	0.67	0.71	-0.04
	CR ( 1) C 10	BD*( 1) C 3 - C 7	0.69	0.68	0.01
		Overall	279.77	277.49	2.28
Ph ring to aromatic C-H bonds	BD ( 1) C 1 - C 2	BD*( 1) C 2 - H 4	1.22	1.21	0.01
	BD ( 1) C 1 - C 2	BD*( 1) C 3 - H 5	2.49	2.41	0.08
	BD ( 1) C 1 - C 2	BD*( 1) C 6 - H 8	2.62	2.58	0.04
	BD ( 1) C 1 - C 3	BD*( 1) C 2 - H 4	2.43	2.58	-0.15
	BD ( 1) C 1 - C 3	BD*( 1) C 3 - H 5	1.23	1.2	0.03
	BD ( 1) C 1 - C 3	BD*( 1) C 7 - H 9	2.63	2.63	0
	BD ( 1) C 2 - C 6	BD*( 1) C 2 - H 4	1.41	1.45	-0.04
	BD ( 1) C 2 - C 6	BD*( 1) C 6 - H 8	1.01	1.02	-0.01
	BD ( 1) C 2 - C 6	BD*( 1) C 10 - H 11	2.73	2.72	0.01
	BD ( 1) C 3 - C 7	BD*( 1) C 3 - H 5	1.4	1.43	-0.03
	BD ( 1) C 3 - C 7	BD*( 1) C 7 - H 9	1	1.01	-0.01
	BD ( 1) C 3 - C 7	BD*( 1) C 10 - H 11	2.75	2.73	0.02
	BD ( 1) C 6 - C 10	BD*( 1) C 2 - H 4	3.05	3.05	0
	BD ( 1) C 6 - C 10	BD*( 1) C 6 - H 8	1.17	1.17	0
	BD ( 1) C 6 - C 10	BD*( 1) C 7 - H 9	2.88	2.85	0.03
	BD ( 1) C 6 - C 10	BD*( 1) C 10 - H 11	1.09	1.13	-0.04
	BD ( 1) C 7 - C 10	BD*( 1) C 3 - H 5	3.02	3.02	0
	BD ( 1) C 7 - C 10	BD*( 1) C 6 - H 8	2.85	2.9	-0.05
	BD ( 1) C 7 - C 10	BD*( 1) C 7 - H 9	1.16	1.14	0.02
	BD ( 1) C 7 - C 10	BD*( 1) C 10 - H 11	1.12	1.12	0
	CR ( 1) C 1	BD*( 1) C 2 - H 4	0	0.52	-0.52
	CR ( 1) C 1	BD*( 1) C 3 - H 5	0.5	0	0.5
	CR ( 1) C 3	BD*( 1) C 7 - C 10	0.69	0.69	0
	CR ( 1) C 6	BD*( 1) C 2 - H 4	0.56	0.57	-0.01
	CR ( 1) C 7	BD*( 1) C 3 - H 5	0.55	0.55	0
		Overall	41.56	41.68	-0.12
Aromatic C-H bonds to ring carbons	BD ( 1) C 2 - H 4	RY*( 1) C 1	0.56	0.96	-0.4
	BD ( 1) C 2 - H 4	BD*( 1) C 1 - C 2	1.05	0.99	0.06
	BD ( 1) C 2 - H 4	BD*( 1) C 1 - C 3	5.32	5.23	0.09
	BD ( 1) C 2 - H 4	BD*( 1) C 2 - C 6	1.21	1.26	-0.05
	BD ( 1) C 2 - H 4	BD*( 1) C 6 - C 10	4.07	4.08	-0.01
	BD ( 1) C 3 - H 5	RY*( 1) C 1	0.52	0.51	0.01
	BD ( 1) C 3 - H 5	BD*( 1) C 1 - C 2	5.34	5.54	-0.2
	BD ( 1) C 3 - H 5	BD*( 1) C 1 - C 3	1.07	1.05	0.02
	BD ( 1) C 3 - H 5	BD*( 1) C 3 - C 7	1.21	1.23	-0.02
	BD ( 1) C 3 - H 5	BD*( 1) C 7 - C 10	4.11	4.17	-0.06
	BD ( 1) C 6 - H 8	BD*( 1) C 1 - C 2	4.11	4.22	-0.11
	BD ( 1) C 6 - H 8	BD*( 1) C 2 - C 6	0.88	0.88	0
	BD ( 1) C 6 - H 8	BD*( 1) C 6 - C 10	0.95	0.97	-0.02
	BD ( 1) C 6 - H 8	BD*( 1) C 7 - C 10	4.3	4.34	-0.04
	BD ( 1) C 7 - H 9	BD*( 1) C 1 - C 3	4.13	4.2	-0.07
	BD ( 1) C 7 - H 9	BD*( 1) C 3 - C 7	0.87	0.91	-0.04
	BD ( 1) C 7 - H 9	BD*( 1) C 6 - C 10	4.37	4.32	0.05
	BD ( 1) C 7 - H 9	BD*( 1) C 7 - C 10	0.95	0.93	0.02
	BD ( 1) C 10 - H 11	BD*( 1) C 2 - C 6	4.4	4.54	-0.14
	BD ( 1) C 10 - H 11	BD*( 1) C 3 - C 7	4.44	4.37	0.07
	BD ( 1) C 10 - H 11	BD*( 1) C 6 - C 10	0.92	0.98	-0.06
	BD ( 1) C 10 - H 11	BD*( 1) C 7 - C 10	0.95	0.95	0
		Overall	55.73	56.63	-0.9
aromatic ring C to ester C-O	BD ( 1) C 1 - C 2	RY*( 1) O 12	1.04	0.84	0.2
	BD ( 1) C 1 - C 2	BD*( 1) O 12 - C 13	1	0	1
	BD ( 2) C 1 - C 2	BD*( 1) O 12 - C 13	0	0.86	-0.86
	BD ( 1) C 1 - C 3	RY*( 1) O 12	1.02	1.14	-0.12
	BD ( 1) C 1 - C 3	BD*( 1) O 12 - C 13	0.84	1.69	-0.85
	BD ( 1) C 1 - C 3	BD*( 1) O 12 - C 13	1.59	0	1.59
	BD ( 1) C 2 - C 6	BD*( 1) C 1 - O 12	5.88	5.99	-0.11
	BD ( 1) C 3 - C 7	BD*( 1) C 1 - O 12	5.99	5.57	0.42
	CR ( 1) C 1	BD*( 1) C 1 - O 12	1.97	1.8	0.17
	CR ( 1) C 1	BD*( 1) O 12 - C 13	0.86	0.84	0.02
	CR ( 1) C 2	BD*( 1) C 1 - O 12	0.66	0.68	-0.02
	CR ( 1) C 3	BD*( 1) C 1 - O 12	0.67	0.63	0.04
	CR ( 1) C 13	BD*( 1) C 1 - O 12	1.45	1.39	0.06
	CR ( 1) C 13	BD*( 1) O 12 - C 13	0.64	0.63	0.01
		Overall	23.61	22.06	1.55
ester C-O to aromatic ring	BD ( 1) C 1 - O 12	RY*( 1) C 13	2.15	0.55	1.6
	BD ( 1) C 1 - O 12	RY*( 6) C 13	0.51	2.04	-1.53
	BD ( 1) C 1 - O 12	BD*( 1) C 2 - C 6	1.74	1.6	0.14
	BD ( 1) C 1 - O 12	BD*( 1) C 3 - C 7	1.73	1.77	-0.04
	BD ( 1) O 12 - C 13	RY*( 2) C 1	2.21	1.13	1.08
	BD ( 1) O 12 - C 13	RY*( 2) C 1	0	0.96	-0.96
	BD ( 1) O 12 - C 13	RY*( 3) C 1	0	1.05	-1.05
	BD ( 1) O 12 - C 13	RY*( 4) C 1	1.51	0	1.51
	BD ( 1) O 12 - C 13	BD*( 1) C 1 - C 2	0.76	1.4	-0.64
	BD ( 1) O 12 - C 13	BD*( 1) C 1 - C 3	0.54	1.65	-1.11
	BD ( 1) O 12 - C 13	BD*( 2) C 1 - C 3	1.99	0	1.99
	CR ( 1) O 12	RY*( 1) C 1	1.14	0	1.14
	CR ( 1) O 12	RY*( 1) C 1	0	1.82	-1.82
	CR ( 1) O 12	RY*( 2) C 1	0.69	0	0.69
	CR ( 1) O 12	RY*( 1) C 13	1.37	0	1.37
	CR ( 1) O 12	RY*( 2) C 13	0	1.05	-1.05
	CR ( 1) O 12	RY*( 4) C 13	0	0.66	-0.66
		Overall	16.34	15.68	0.66
between aromatic C-H and ester C-O	BD ( 1) C 1 - O 12	BD*( 1) C 13 - H 15	1.44	0	1.44
	BD ( 1) C 2 - H 4	BD*( 1) C 1 - O 12	1.03	0.88	0.15
	BD ( 1) C 3 - H 5	BD*( 1) C 1 - O 12	1.02	1.11	-0.09
		Overall	3.49	1.99	1.5
ester C-O oxygen (O) lone pair to	LP ( 1) O 12	RY*( 1) C 1	2.47	1.97	0.5
aromatic ring	LP ( 1) O 12	RY*( 2) C 1	0	0.62	-0.62
	LP ( 1) O 12	BD*( 1) C 1 - C 3	0.92	0	0.92
	LP ( 1) O 12	BD*( 2) C 1 - C 3	6.98	0	6.98
	LP ( 1) O 12	BD*( 1) C 1 - C 2	0	4.08	-4.08
	LP ( 1) O 12	BD*( 2) C 1 - C 2	0	4.68	-4.68
	LP ( 2) O 12	RY*( 4) C 1	0	0.51	-0.51
	LP ( 2) O 12	RY*( 5) C 1	0.92	0.68	0.24
	LP ( 2) O 12	RY*( 3) C 13	1.12	0.93	0.19
	LP ( 2) O 12	RY*( 5) C 13	1.39	0	1.39
	LP ( 2) O 12	RY*( 6) C 13	0	1.19	-1.19
	LP ( 2) O 12	BD*( 1) C 2 - C 6	0.51	0	0.51
	LP ( 2) O 12	BD*( 1) C 1 - C 2	6.14	4.11	2.03
	LP ( 2) O 12	BD*( 2) C 1 - C 2	0	10.57	-10.57
	LP ( 2) O 12	BD*( 1) C 1 - C 3	6.08	4.2	1.88
		Overall	26.53	33.54	-7.01
ester C-O oxygen (O) lone pair to	LP ( 1) O 12	BD*( 2) C 13 - O 14	9.04	3.46	5.58
carbonyl C=O	LP ( 2) O 12	BD*( 1) C 13 - O 14	57.42	44.08	13.34
	LP ( 2) O 12	BD*( 2) C 13 - O 14	0	0.8	-0.8
	LP ( 1) O 12	RY*( 1) C 13	1.56	0	1.56
	LP ( 1) O 12	RY*( 2) C 13	0	0.96	-0.96
	LP ( 1) O 12	RY*( 4) C 13	0.92	0	0.92
	LP ( 1) O 12	RY*( 5) C 13	0	0.53	-0.53
		Overall	68.94	49.83	19.11
ester O to formyl C-H	LP ( 1) O 12	BD*( 1) C 13 - H 15	1.78	5.82	-4.04
		Overall	1.78	5.82	-4.04
ester C-O to carbonyl C=O	BD ( 1) C 1 - O 12	BD*( 2) C 13 - O 14	0	2.53	-2.53
	BD ( 1) O 12 - C 13	RY*( 1) O 14	0	1.16	-1.16
		Overall	0	3.69	-3.69
carbonyl C=O to ester C-O	BD ( 1) C 13 - O 14	RY*( 1) O 12	0.62	0	0.62
	BD ( 1) C 13 - O 14	RY*( 2) O 12	0	0.53	-0.53
	BD ( 1) C 13 - O 14	BD*( 1) C 13 - O 14	0.58	0.61	-0.03
	BD ( 2) C 13 - O 14	RY*( 1) O 12	0	1.29	-1.29
	BD ( 1) C 13 - O 14	RY*( 2) O 12	0.66	0	0.66
	BD ( 1) C 13 - O 14	RY*( 3) O 12	0.89	0	0.89
	BD ( 1) C 13 - O 14	RY*( 1) C 13	1.29	1.32	-0.03
	BD ( 1) C 13 - O 14	BD*( 1) C 1 - O 12	0.5	1.56	-1.06
		Overall	4.54	5.31	-0.77
carbonyl O lone pair A217to ester C-O	LP ( 1) O 14	BD*( 1) O 12 - C 13	0.94	0.73	0.21
	LP ( 2) O 14	BD*( 1) C 1 - O 12	0.56	0	0.56
	LP ( 2) O 14	BD*( 1) O 12 - C 13	42.91	43.82	-0.91
		Overall	44.41	44.55	-0.14
ring to carbonyl C=O	BD ( 2) C 1 - C 2	BD*( 2) C 13 - O 14	0	0.72	-0.72
		Overall	0	0.72	-0.72
formyl C-H and ester	BD ( 1) C 13 - H 15	RY*( 2) O 12	1.21	0.95	0.26
	BD ( 1) C 13 - H 15	BD*( 1) C 1 - O 12	5.48	0.59	4.89
	BD ( 1) C 13 - H 15	BD*( 1) O 12 - C 13	1.04	1.99	-0.95
		Overall	7.73	3.53	4.2
between formyl C-H and carbonyl C=O	BD ( 1) C 13 - H 15	RY*( 1) O 14	1.41	1.78	-0.37
	LP ( 1) O 14	BD*( 1) C 13 - H 15	1.65	1.87	-0.22
	LP ( 2) O 14	BD*( 1) C 13 - H 15	24.58	25.3	-0.72
		Overall	27.64	28.95	-1.31
within carbonyl C=O	CR ( 1) C 13	RY*( 4) O 14	0	0.57	-0.57
	CR ( 1) C 13	RY*( 5) O 14	0.51	0	0.51
	CR ( 1) O 14	RY*( 1) C 13	5.24	5.94	-0.7
	LP ( 1) O 14	RY*( 1) C 13	11.12	13.39	-2.27
	LP ( 1) O 14	RY*( 2) C 13	0.84	0	0.84
	LP ( 2) O 14	RY*( 2) C 13	1.72	1.67	0.05
	LP ( 2) O 14	RY*( 4) C 13	0.76	0.65	0.11
	LP ( 2) O 14	RY*( 5) C 13	0	0.72	-0.72
	LP ( 2) O 14	RY*( 11) O 14	0.64	0	0.64
		Overall	20.83	22.94	-2.11
Carbonyl O to ring	LP ( 2) O 14	BD*( 2) C 1 - C 3	0.75	0	0.75	n ---> π*
		Overall	0.75	0	0.75
		Overall	623.65	614.41	9.24
